# Supplementary material for: ER-associated SNAREs and Sey1p mediate nuclear fusion at two distinct steps during yeast mating
Source: PubMed Central journal article supplement — Mol Biol Cell. 2013 Dec 15;24(24):3896–908. doi: 10.1091/mbc.E13-08-0441 (PMC3861085; doi:10.1091/mbc.e13-08-0441), 2013-12-15

# Supplemental Materials

*Molecular Biology of the Cell*

Rogers et al.

**Figure S1.** SNARE mutants exhibit bilateral nuclear fusion defects. Nuclear fusion efficiencies as described in 3A, except each strain is mated against wild-type (e.g., WT x WT, *sec20-1* x WT, etc.). Wild-type data is pooled from only the subset of experiments shown here. Number of independent trials: wild-type, 14; *sec20-1*, 6; *ufe1-1*, 4; *sec22-3*, 1; *bos1-1*, 2; *use1-0layer*, 3; *use1-10AA*, 2. Errors bars show +/- standard error of the mean (SEM) for strains where more than one trial was performed.

Movie S1

Wild type nuclear fusion during yeast mating. Green channel: GFP-Prm3p marking the nuclear envelope. Red channel: mCherry-HDEL marking the ER.

Movie S2

*sey1Δ* x *sey1Δ* defect in nuclear fusion during yeast mating. Green channel: GFP-Prm3p marking the nuclear envelope. Red channel: mCherry-HDEL marking the ER.

Movie S3

*sey1Δ* x *sey1Δ* mating showing an example of successful nuclear fusion. Green channel: GFP-Prm3p marking the nuclear envelope. Red channel: mCherry-HDEL marking the ER.

% Unfused Nuclei

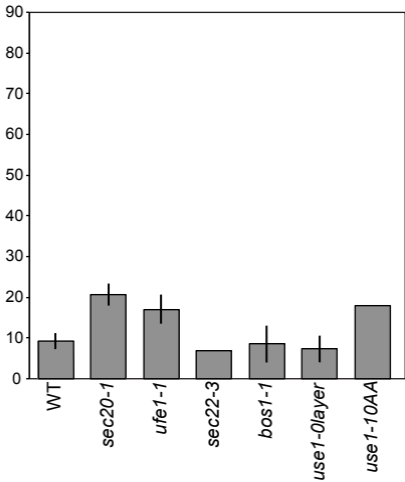

Supplement: supp_E13-08-0441v1_CombinedSupMats.pdf [file supp_E13-08-0441v1_CombinedSupMats.pdf]
